# Supplementary material for: Brief communication: Rapid ∼ 335 × 10 6 m 3 bed erosion after detachment of the Sedongpu Glacier (Tibet)
Source: Copernicus journal article supplement (doi:10.5194/tc-17-2533-2023), 2023-06-28
Supplement: Supplementary file 1 [file tc-17-2533-2023-supplement.zip]

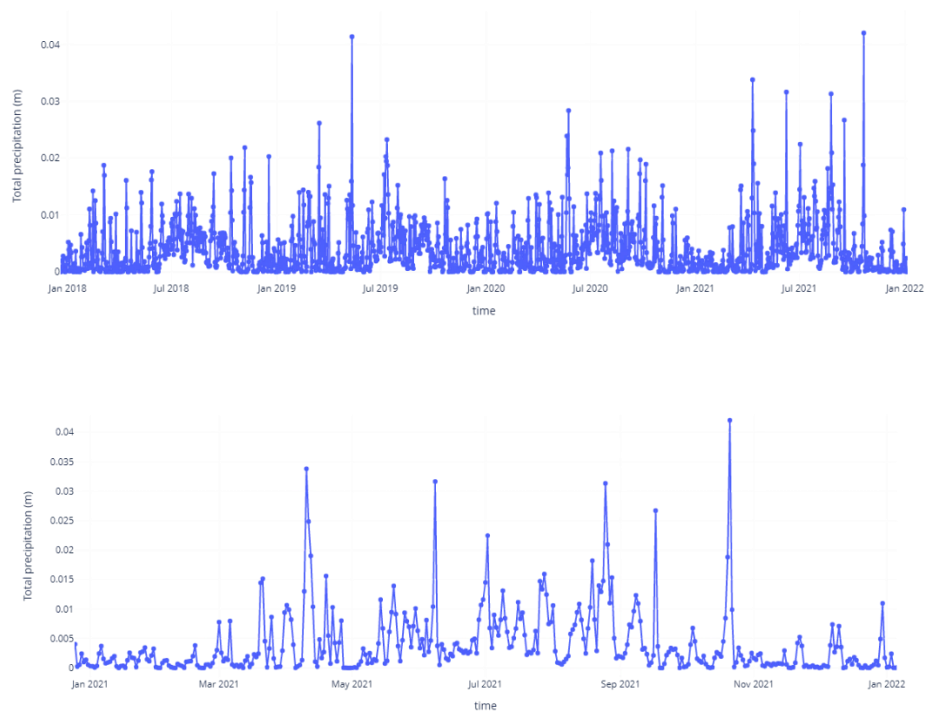

**Supplementary Figure S1: Total daily precipitation from ERA5-land reanalysis for grid point 30° lat 95° lon.**

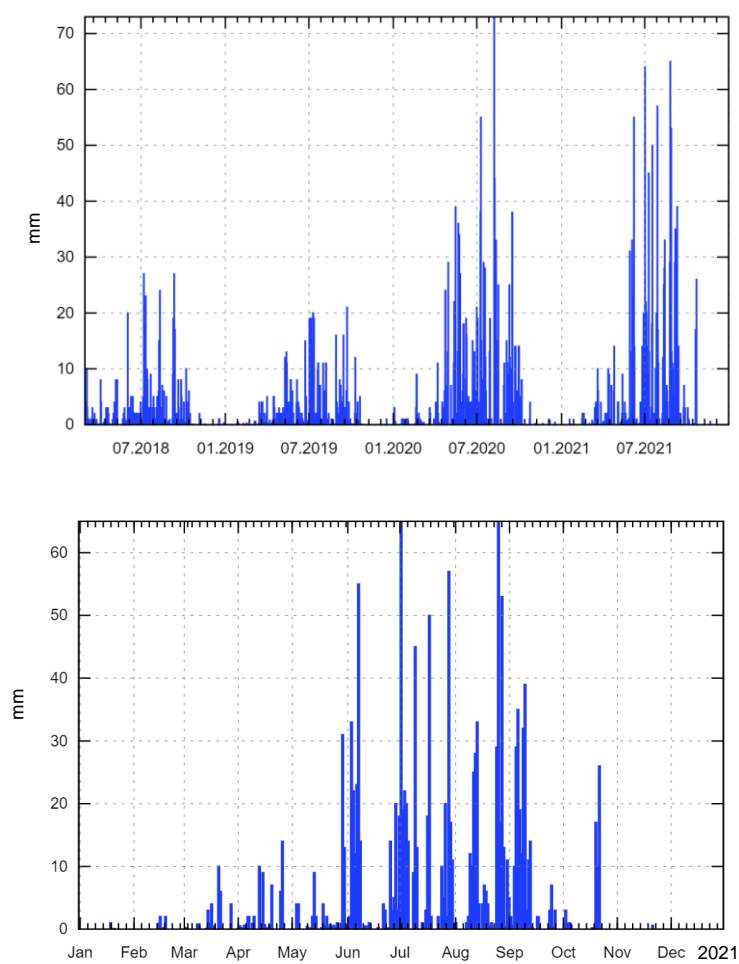

**Supplementary Figure S2: Total daily precipitation measured at Nyingchi meteorological station.**

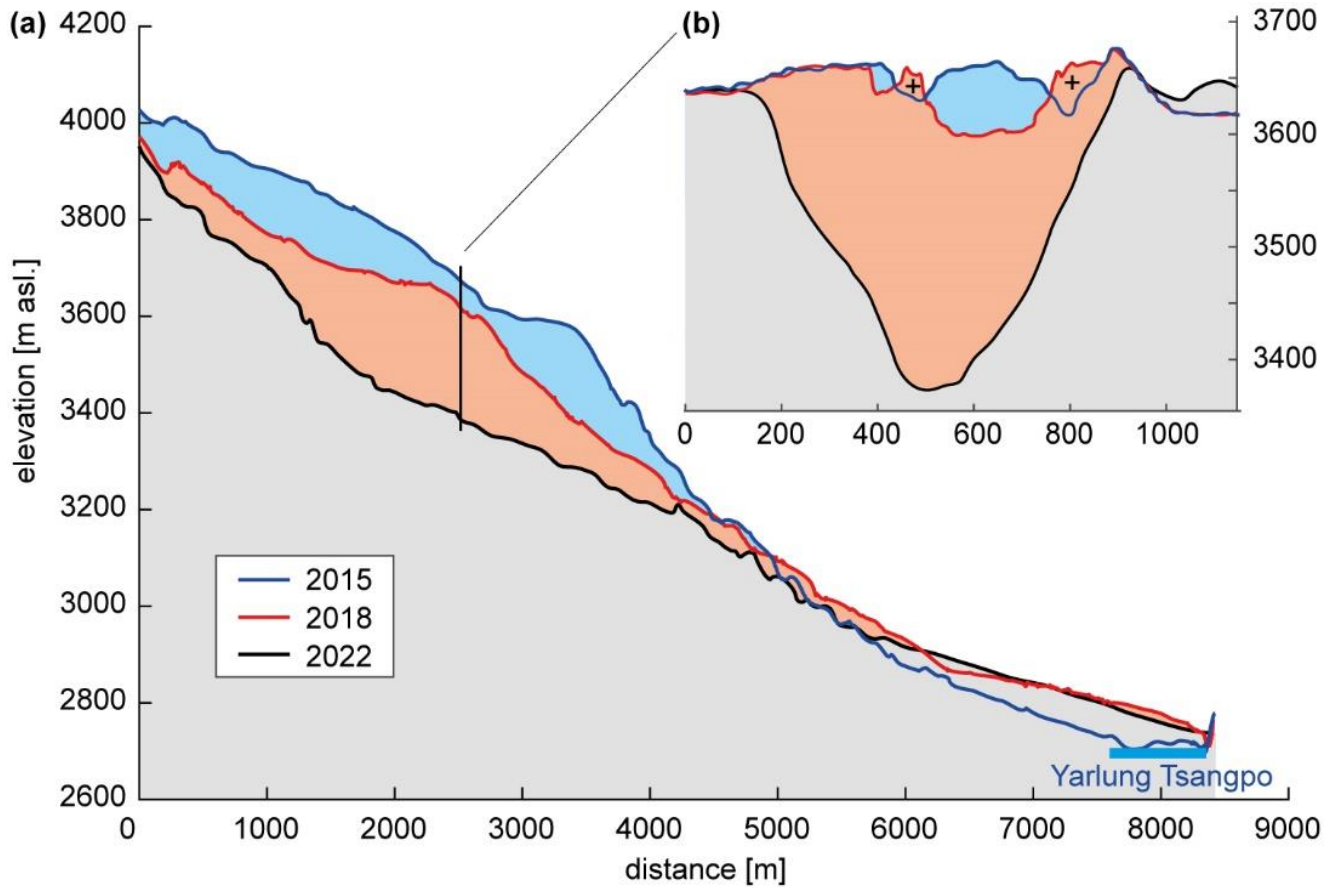

**Supplementary Figure S3:** Elevation profile of 13 Nov 2015, 30 Dec 2018 (after glacier detachment), and 4 Nov 2022. The + signs in panel b) indicate 2015–2018 elevation increases from the 2017 rock-ice avalanche or splash deposits of the 2018 glacier detachment. For profile locations see Fig. 2 in the main manuscript.

### Further attachment (separate gif-file):

**Supplementary Animation A1:** Animation of ortho-rectified Sentinel-1 radar images between 2 Mar and 21 Nov 2021 (credit: Copernicus Sentinel data). North to the top. The increasing dark area indicates the evolution of the erosion canyon. Animation produced in Google Earth Engine.
