# Supplementary material for: Brief communication: Rapid ∼ 335 × 10 6 m 3 bed erosion after detachment of the Sedongpu Glacier (Tibet)
Source: Copernicus journal article supplement (doi:10.5194/tc-17-2533-2023), 2023-06-28
Supplement: Supplementary file 2 [file tc-17-2533-2023-supplement.zip]

Archive with 3 entries (3 files):
- tc-17-2533-2023-supplement-title-page.pdf
- Kaab_Girod_Sedongpu_Suppl_5.pdf
- sentinel1_sedongpu_desc.gif
