# Supplementary material for: Brief communication: Rapid ∼ 335 × 10 6 m 3 bed erosion after detachment of the Sedongpu Glacier (Tibet)
Source: Copernicus journal article supplement (doi:10.5194/tc-17-2533-2023), 2023-06-28
Supplement: Supplementary file 2 [file tc-17-2533-2023-supplement.zip › tc-17-2533-2023-supplement-title-page.pdf]

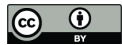

## *Supplement of*

# **Brief communication: Rapid $\sim 335 \times 10^6 \text{ m}^3$ bed erosion after detachment of the Sedongpu Glacier (Tibet)**

**Andreas Kääb and Luc Girod**

*Correspondence to:* Andreas Kääb (kaeab@geo.uio.no)

- tc-17-2533-2023-supplement-title-page.pdf
- Kaab\_Girod\_Sedongpu\_Suppl\_5.pdf
- sentinel1\_sedongpu\_desc.gif

The copyright of individual parts of the supplement might differ from the article licence.
