# Supplementary figures and images for: Brief communication: Rapid ∼ 335 × 10 6 m 3 bed erosion after detachment of the Sedongpu Glacier (Tibet)
Source: Copernicus journal article supplement (doi:10.5194/tc-17-2533-2023), 2023-06-28

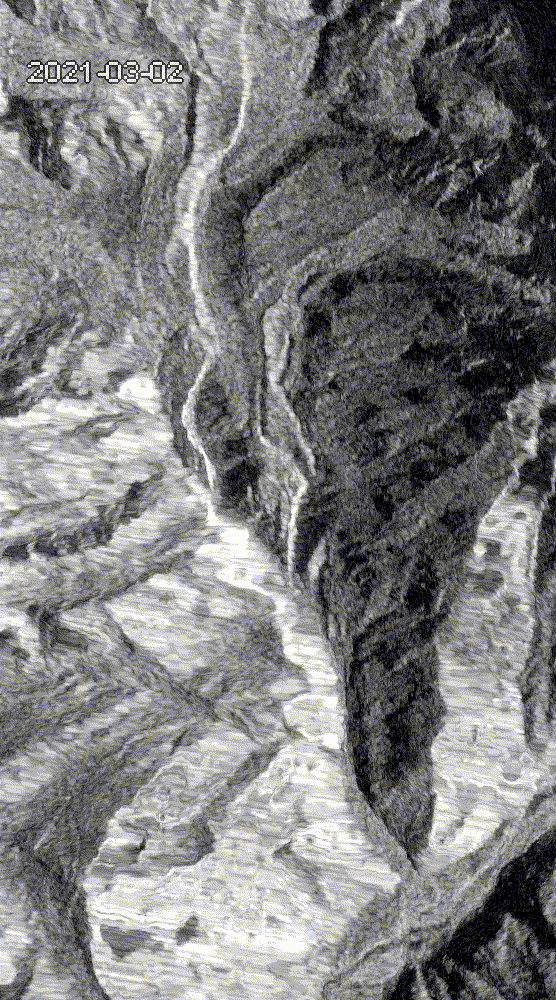

Supplement: Supplementary file 2 [file tc-17-2533-2023-supplement.zip › sentinel1_sedongpu_desc.gif]
